# Supplementary material
Source: publisher figshare collection journal article supplement (https://acs.figshare.com/ndownloader/files/4445212)
Supplement: Supplementary file 1 [file 4445212]

 
data_1
 
_audit_creation_method            SHELXL-97
_chemical_name_systematic
;
 ?
;
_chemical_name_common             ?
_chemical_melting_point           ?
_chemical_formula_moiety          ?
_chemical_formula_sum
 'C H1.50 Cl2.50 Si'
_chemical_formula_weight          130.24
 
loop_
 _atom_type_symbol
 _atom_type_description
 _atom_type_scat_dispersion_real
 _atom_type_scat_dispersion_imag
 _atom_type_scat_source
 'C'  'C'   0.0033   0.0016
 'International Tables Vol C Tables 4.2.6.8 and 6.1.1.4'
 'H'  'H'   0.0000   0.0000
 'International Tables Vol C Tables 4.2.6.8 and 6.1.1.4'
 'Si'  'Si'   0.0817   0.0704
 'International Tables Vol C Tables 4.2.6.8 and 6.1.1.4'
 'Cl'  'Cl'   0.1484   0.1585
 'International Tables Vol C Tables 4.2.6.8 and 6.1.1.4'
 
_symmetry_cell_setting            Triclinic
_symmetry_space_group_name_H-M    P-1
 
loop_
 _symmetry_equiv_pos_as_xyz
 'x, y, z'
 '-x, -y, -z'
 
_cell_length_a                    6.1896(5)
_cell_length_b                    8.3969(7)
_cell_length_c                    9.0412(9)
_cell_angle_alpha                 89.363(3)
_cell_angle_beta                  80.569(3)
_cell_angle_gamma                 78.809(2)
_cell_volume                      454.64(7)
_cell_formula_units_Z             4
_cell_measurement_temperature     293(2)
_cell_measurement_reflns_used     ?
_cell_measurement_theta_min       ?
_cell_measurement_theta_max       ?
 
_exptl_crystal_description        ?
_exptl_crystal_colour             ?
_exptl_crystal_size_max           ?
_exptl_crystal_size_mid           ?
_exptl_crystal_size_min           ?
_exptl_crystal_density_meas       ?
_exptl_crystal_density_diffrn     1.903
_exptl_crystal_density_method     'not measured'
_exptl_crystal_F_000              256
_exptl_absorpt_coefficient_mu     1.775
_exptl_absorpt_correction_type    ?
_exptl_absorpt_correction_T_min   ?
_exptl_absorpt_correction_T_max   ?
_exptl_absorpt_process_details    ?
 
_exptl_special_details
;
 ?
;
 
_diffrn_ambient_temperature       293(2)
_diffrn_radiation_wavelength      0.71073
_diffrn_radiation_type            MoK\a
_diffrn_radiation_source          'fine-focus sealed tube'
_diffrn_radiation_monochromator   graphite
_diffrn_measurement_device_type   Rigaku R-axis Rapid S diffractometer
_diffrn_measurement_method        \w-scans
_diffrn_detector_area_resol_mean  ?
_diffrn_standards_number          ?
_diffrn_standards_interval_count  ?
_diffrn_standards_interval_time   ?
_diffrn_standards_decay_%         ?
_diffrn_reflns_number             4423
_diffrn_reflns_av_R_equivalents   0.0257
_diffrn_reflns_av_sigmaI/netI     0.0331
_diffrn_reflns_limit_h_min        -8
_diffrn_reflns_limit_h_max        7
_diffrn_reflns_limit_k_min        -10
_diffrn_reflns_limit_k_max        10
_diffrn_reflns_limit_l_min        -11
_diffrn_reflns_limit_l_max        11
_diffrn_reflns_theta_min          3.33
_diffrn_reflns_theta_max          27.46
_reflns_number_total              2047
_reflns_number_gt                 1772
_reflns_threshold_expression      >2sigma(I)
 
_computing_data_collection        ?
_computing_cell_refinement        ?
_computing_data_reduction         ?
_computing_structure_solution     ?
_computing_structure_refinement   'SHELXL-97 (Sheldrick, 1997)'
_computing_molecular_graphics     'Ortep-3 for Windows (Farrugia, 1997)'
_computing_publication_material   ?
 
_refine_special_details
;
 Refinement of F^2^ against ALL reflections.  The weighted R-factor wR and
 goodness of fit S are based on F^2^, conventional R-factors R are based
 on F, with F set to zero for negative F^2^. The threshold expression of
 F^2^ > 2sigma(F^2^) is used only for calculating R-factors(gt) etc. and is
 not relevant to the choice of reflections for refinement.  R-factors based
 on F^2^ are statistically about twice as large as those based on F, and R-
 factors based on ALL data will be even larger.
;
 
_refine_ls_structure_factor_coef  Fsqd
_refine_ls_matrix_type            full
_refine_ls_weighting_scheme       calc
_refine_ls_weighting_details
 'calc w=1/[\s^2^(Fo^2^)+(0.0489P)^2^+0.6099P] where P=(Fo^2^+2Fc^2^)/3'
_atom_sites_solution_primary      direct
_atom_sites_solution_secondary    difmap
_atom_sites_solution_hydrogens    geom
_refine_ls_hydrogen_treatment     mixed
_refine_ls_extinction_method      none
_refine_ls_extinction_coef        ?
_refine_ls_number_reflns          2047
_refine_ls_number_parameters      94
_refine_ls_number_restraints      0
_refine_ls_R_factor_all           0.0447
_refine_ls_R_factor_gt            0.0394
_refine_ls_wR_factor_ref          0.1103
_refine_ls_wR_factor_gt           0.1067
_refine_ls_goodness_of_fit_ref    1.163
_refine_ls_restrained_S_all       1.163
_refine_ls_shift/su_max           0.000
_refine_ls_shift/su_mean          0.000
 
loop_
 _atom_site_label
 _atom_site_type_symbol
 _atom_site_fract_x
 _atom_site_fract_y
 _atom_site_fract_z
 _atom_site_U_iso_or_equiv
 _atom_site_adp_type
 _atom_site_occupancy
 _atom_site_symmetry_multiplicity
 _atom_site_calc_flag
 _atom_site_refinement_flags
 _atom_site_disorder_assembly
 _atom_site_disorder_group
Si1 Si 1.00373(14) 0.45363(10) 0.68155(9) 0.0224(2) Uani 1 1 d . . .
Si2 Si 0.81038(14) 0.83398(9) 0.75788(9) 0.0218(2) Uani 1 1 d . . .
Cl1 Cl 1.32350(13) 0.46527(10) 0.70633(10) 0.0325(2) Uani 1 1 d . . .
Cl2 Cl 0.84523(14) 0.37545(10) 0.87430(9) 0.0304(2) Uani 1 1 d . . .
Cl3 Cl 0.63732(15) 0.79098(10) 0.95817(9) 0.0349(2) Uani 1 1 d . . .
Cl4 Cl 1.09822(14) 0.89837(10) 0.78755(11) 0.0363(2) Uani 1 1 d . . .
Cl5 Cl 0.62725(13) 1.02681(9) 0.66693(9) 0.0291(2) Uani 1 1 d . . .
C1 C 0.8602(5) 0.6576(3) 0.6268(3) 0.0228(6) Uani 1 1 d . . .
C2 C 1.0207(6) 0.3011(4) 0.5303(3) 0.0254(6) Uani 1 1 d . . .
H1 H 0.711(6) 0.643(4) 0.616(4) 0.020(8) Uiso 1 1 d . . .
H2 H 1.098(7) 0.199(5) 0.568(5) 0.045(12) Uiso 1 1 d . . .
H3 H 0.869(7) 0.291(5) 0.523(4) 0.037(11) Uiso 1 1 d . . .
 
loop_
 _atom_site_aniso_label
 _atom_site_aniso_U_11
 _atom_site_aniso_U_22
 _atom_site_aniso_U_33
 _atom_site_aniso_U_23
 _atom_site_aniso_U_13
 _atom_site_aniso_U_12
Si1 0.0293(4) 0.0184(4) 0.0183(4) 0.0039(3) -0.0035(3) -0.0022(3)
Si2 0.0267(4) 0.0174(4) 0.0198(4) 0.0012(3) -0.0037(3) -0.0011(3)
Cl1 0.0276(4) 0.0318(4) 0.0370(5) 0.0067(3) -0.0068(3) -0.0026(3)
Cl2 0.0398(5) 0.0267(4) 0.0233(4) 0.0074(3) -0.0012(3) -0.0070(3)
Cl3 0.0441(5) 0.0290(4) 0.0243(4) 0.0046(3) 0.0053(3) 0.0015(3)
Cl4 0.0337(4) 0.0325(4) 0.0464(5) 0.0005(4) -0.0140(4) -0.0091(3)
Cl5 0.0342(4) 0.0199(4) 0.0307(4) 0.0050(3) -0.0062(3) 0.0015(3)
C1 0.0276(15) 0.0188(14) 0.0206(15) 0.0032(11) -0.0022(12) -0.0029(11)
C2 0.0322(17) 0.0200(14) 0.0223(15) 0.0051(12) -0.0012(12) -0.0042(12)
 
_geom_special_details
;
 All esds (except the esd in the dihedral angle between two l.s. planes)
 are estimated using the full covariance matrix.  The cell esds are taken
 into account individually in the estimation of esds in distances, angles
 and torsion angles; correlations between esds in cell parameters are only
 used when they are defined by crystal symmetry.  An approximate (isotropic)
 treatment of cell esds is used for estimating esds involving l.s. planes.
;
 
loop_
 _geom_bond_atom_site_label_1
 _geom_bond_atom_site_label_2
 _geom_bond_distance
 _geom_bond_site_symmetry_2
 _geom_bond_publ_flag
Si1 C2 1.860(3) . ?
Si1 C1 1.872(3) . ?
Si1 Cl2 2.0236(11) . ?
Si1 Cl1 2.0489(12) . ?
Si2 C1 1.854(3) . ?
Si2 Cl3 2.0142(11) . ?
Si2 Cl4 2.0179(12) . ?
Si2 Cl5 2.0362(11) . ?
C1 C2 1.557(4) 2_766 ?
C2 C1 1.557(4) 2_766 ?
 
loop_
 _geom_angle_atom_site_label_1
 _geom_angle_atom_site_label_2
 _geom_angle_atom_site_label_3
 _geom_angle
 _geom_angle_site_symmetry_1
 _geom_angle_site_symmetry_3
 _geom_angle_publ_flag
C2 Si1 C1 109.85(14) . . ?
C2 Si1 Cl2 108.27(10) . . ?
C1 Si1 Cl2 112.77(10) . . ?
C2 Si1 Cl1 107.68(11) . . ?
C1 Si1 Cl1 109.03(11) . . ?
Cl2 Si1 Cl1 109.10(5) . . ?
C1 Si2 Cl3 111.71(10) . . ?
C1 Si2 Cl4 111.87(11) . . ?
Cl3 Si2 Cl4 109.60(5) . . ?
C1 Si2 Cl5 108.21(10) . . ?
Cl3 Si2 Cl5 108.08(5) . . ?
Cl4 Si2 Cl5 107.18(5) . . ?
C2 C1 Si2 110.5(2) 2_766 . ?
C2 C1 Si1 108.9(2) 2_766 . ?
Si2 C1 Si1 119.96(17) . . ?
C1 C2 Si1 115.0(2) 2_766 . ?
 
_diffrn_measured_fraction_theta_max    0.988
_diffrn_reflns_theta_full              27.46
_diffrn_measured_fraction_theta_full   0.988
_refine_diff_density_max    1.321
_refine_diff_density_min   -0.683
_refine_diff_density_rms    0.112

#===END

data_4
 
_audit_creation_method            SHELXL-97
_chemical_name_systematic
;
 ?
;
_chemical_name_common             ?
_chemical_melting_point           ?
_chemical_formula_moiety          ?
_chemical_formula_sum
 'C6 H12 Cl8 Si4'
_chemical_formula_weight          480.12
 
loop_
 _atom_type_symbol
 _atom_type_description
 _atom_type_scat_dispersion_real
 _atom_type_scat_dispersion_imag
 _atom_type_scat_source
 'C'  'C'   0.0033   0.0016
 'International Tables Vol C Tables 4.2.6.8 and 6.1.1.4'
 'H'  'H'   0.0000   0.0000
 'International Tables Vol C Tables 4.2.6.8 and 6.1.1.4'
 'Cl'  'Cl'   0.1484   0.1585
 'International Tables Vol C Tables 4.2.6.8 and 6.1.1.4'
 'Si'  'Si'   0.0817   0.0704
 'International Tables Vol C Tables 4.2.6.8 and 6.1.1.4'
 
_symmetry_cell_setting            Triclinic
_symmetry_space_group_name_H-M    P-1
 
loop_
 _symmetry_equiv_pos_as_xyz
 'x, y, z'
 '-x, -y, -z'
 
_cell_length_a                    6.7991(3)
_cell_length_b                    8.6802(4)
_cell_length_c                    9.2531(5)
_cell_angle_alpha                 84.1808(18)
_cell_angle_beta                  67.1898(19)
_cell_angle_gamma                 71.4251(11)
_cell_volume                      477.01(4)
_cell_formula_units_Z             1
_cell_measurement_temperature     293(2)
_cell_measurement_reflns_used     ?
_cell_measurement_theta_min       ?
_cell_measurement_theta_max       ?
 
_exptl_crystal_description        ?
_exptl_crystal_colour             ?
_exptl_crystal_size_max           ?
_exptl_crystal_size_mid           ?
_exptl_crystal_size_min           ?
_exptl_crystal_density_meas       ?
_exptl_crystal_density_diffrn     1.671
_exptl_crystal_density_method     'not measured'
_exptl_crystal_F_000              240
_exptl_absorpt_coefficient_mu     1.413
_exptl_absorpt_correction_type    none
_exptl_absorpt_correction_T_min   ?
_exptl_absorpt_correction_T_max   ?
_exptl_absorpt_process_details    ?
 
_exptl_special_details
;
 ?
;
 
_diffrn_ambient_temperature       293(2)
_diffrn_radiation_wavelength      0.71073
_diffrn_radiation_type            MoK\a
_diffrn_radiation_source          'fine-focus sealed tube'
_diffrn_radiation_monochromator   graphite
_diffrn_measurement_device_type   Rigaku R-axis Rapid S diffractometer
_diffrn_measurement_method        \w-scans
_diffrn_detector_area_resol_mean  ?
_diffrn_standards_number          ?
_diffrn_standards_interval_count  ?
_diffrn_standards_interval_time   ?
_diffrn_standards_decay_%         ?
_diffrn_reflns_number             4602
_diffrn_reflns_av_R_equivalents   0.0156
_diffrn_reflns_av_sigmaI/netI     0.0194
_diffrn_reflns_limit_h_min        -8
_diffrn_reflns_limit_h_max        7
_diffrn_reflns_limit_k_min        -11
_diffrn_reflns_limit_k_max        11
_diffrn_reflns_limit_l_min        -12
_diffrn_reflns_limit_l_max        12
_diffrn_reflns_theta_min          3.35
_diffrn_reflns_theta_max          27.48
_reflns_number_total              2137
_reflns_number_gt                 1991
_reflns_threshold_expression      >2sigma(I)
 
_computing_data_collection        ?
_computing_cell_refinement        ?
_computing_data_reduction         ?
_computing_structure_solution     ?
_computing_structure_refinement   'SHELXL-97 (Sheldrick, 1997)'
_computing_molecular_graphics     'Ortep-3 for Windows (Farrugia, 1997)'
_computing_publication_material   ?
 
_refine_special_details
;
 Refinement of F^2^ against ALL reflections.  The weighted R-factor wR and
 goodness of fit S are based on F^2^, conventional R-factors R are based
 on F, with F set to zero for negative F^2^. The threshold expression of
 F^2^ > 2sigma(F^2^) is used only for calculating R-factors(gt) etc. and is
 not relevant to the choice of reflections for refinement.  R-factors based
 on F^2^ are statistically about twice as large as those based on F, and R-
 factors based on ALL data will be even larger.
;
 
_refine_ls_structure_factor_coef  Fsqd
_refine_ls_matrix_type            full
_refine_ls_weighting_scheme       calc
_refine_ls_weighting_details
 'calc w=1/[\s^2^(Fo^2^)+(0.0302P)^2^+0.4753P] where P=(Fo^2^+2Fc^2^)/3'
_atom_sites_solution_primary      direct
_atom_sites_solution_secondary    difmap
_atom_sites_solution_hydrogens    geom
_refine_ls_hydrogen_treatment     mixed
_refine_ls_extinction_method      none
_refine_ls_extinction_coef        ?
_refine_ls_number_reflns          2137
_refine_ls_number_parameters      82
_refine_ls_number_restraints      0
_refine_ls_R_factor_all           0.0291
_refine_ls_R_factor_gt            0.0272
_refine_ls_wR_factor_ref          0.0838
_refine_ls_wR_factor_gt           0.0831
_refine_ls_goodness_of_fit_ref    1.220
_refine_ls_restrained_S_all       1.220
_refine_ls_shift/su_max           0.000
_refine_ls_shift/su_mean          0.000
 
loop_
 _atom_site_label
 _atom_site_type_symbol
 _atom_site_fract_x
 _atom_site_fract_y
 _atom_site_fract_z
 _atom_site_U_iso_or_equiv
 _atom_site_adp_type
 _atom_site_occupancy
 _atom_site_symmetry_multiplicity
 _atom_site_calc_flag
 _atom_site_refinement_flags
 _atom_site_disorder_assembly
 _atom_site_disorder_group
C1 C 0.2934(3) 0.1658(3) -0.0103(3) 0.0226(4) Uani 1 1 d . . .
H1A H 0.2517 0.1273 -0.0857 0.027 Uiso 1 1 calc R . .
H1B H 0.1898 0.2731 0.0268 0.027 Uiso 1 1 calc R . .
C2 C 0.4642(3) -0.1800(2) 0.0950(2) 0.0193(4) Uani 1 1 d . . .
H2 H 0.4290 -0.2158 0.0133 0.023 Uiso 1 1 calc R . .
C3 C 0.1882(4) -0.3900(3) 0.3333(3) 0.0382(6) Uani 1 1 d . . .
H3A H 0.2014 -0.4759 0.4062 0.057 Uiso 1 1 calc R . .
H3B H 0.1502 -0.4229 0.2542 0.057 Uiso 1 1 calc R . .
H3C H 0.0731 -0.2944 0.3880 0.057 Uiso 1 1 calc R . .
Cl1 Cl -0.05956(9) 0.02174(8) 0.25397(8) 0.03596(17) Uani 1 1 d . . .
Cl2 Cl 0.32864(11) 0.12313(7) 0.32096(7) 0.03346(16) Uani 1 1 d . . .
Cl3 Cl 0.69761(10) -0.55282(7) 0.12310(8) 0.03375(16) Uani 1 1 d . . .
Cl4 Cl 0.55950(15) -0.29431(9) 0.40501(8) 0.0468(2) Uani 1 1 d . . .
Si1 Si 0.26351(9) 0.02718(7) 0.15794(7) 0.01990(14) Uani 1 1 d . . .
Si2 Si 0.45632(10) -0.34519(7) 0.24069(7) 0.02245(15) Uani 1 1 d . . .
 
loop_
 _atom_site_aniso_label
 _atom_site_aniso_U_11
 _atom_site_aniso_U_22
 _atom_site_aniso_U_33
 _atom_site_aniso_U_23
 _atom_site_aniso_U_13
 _atom_site_aniso_U_12
C1 0.0167(9) 0.0203(10) 0.0261(11) 0.0021(8) -0.0063(8) -0.0019(8)
C2 0.0183(9) 0.0171(9) 0.0204(10) -0.0004(7) -0.0056(8) -0.0047(8)
C3 0.0278(12) 0.0296(12) 0.0430(15) 0.0122(11) -0.0005(11) -0.0097(10)
Cl1 0.0174(3) 0.0336(3) 0.0461(4) 0.0070(2) -0.0028(2) -0.0068(2)
Cl2 0.0428(3) 0.0297(3) 0.0264(3) -0.0072(2) -0.0100(2) -0.0104(3)
Cl3 0.0298(3) 0.0191(3) 0.0428(3) 0.0003(2) -0.0093(2) -0.0004(2)
Cl4 0.0753(5) 0.0387(4) 0.0404(4) 0.0079(3) -0.0383(4) -0.0174(3)
Si1 0.0164(3) 0.0175(3) 0.0202(3) -0.0002(2) -0.0021(2) -0.0035(2)
Si2 0.0233(3) 0.0183(3) 0.0221(3) 0.0028(2) -0.0063(2) -0.0051(2)
 
_geom_special_details
;
 All esds (except the esd in the dihedral angle between two l.s. planes)
 are estimated using the full covariance matrix.  The cell esds are taken
 into account individually in the estimation of esds in distances, angles
 and torsion angles; correlations between esds in cell parameters are only
 used when they are defined by crystal symmetry.  An approximate (isotropic)
 treatment of cell esds is used for estimating esds involving l.s. planes.
;
 
loop_
 _geom_bond_atom_site_label_1
 _geom_bond_atom_site_label_2
 _geom_bond_distance
 _geom_bond_site_symmetry_2
 _geom_bond_publ_flag
C1 C2 1.566(3) 2_655 ?
C1 Si1 1.855(2) . ?
C2 C1 1.566(3) 2_655 ?
C2 Si1 1.862(2) . ?
C2 Si2 1.865(2) . ?
C3 Si2 1.839(3) . ?
Cl1 Si1 2.0398(8) . ?
Cl2 Si1 2.0427(8) . ?
Cl3 Si2 2.0624(8) . ?
Cl4 Si2 2.0394(9) . ?
 
loop_
 _geom_angle_atom_site_label_1
 _geom_angle_atom_site_label_2
 _geom_angle_atom_site_label_3
 _geom_angle
 _geom_angle_site_symmetry_1
 _geom_angle_site_symmetry_3
 _geom_angle_publ_flag
C2 C1 Si1 113.76(14) 2_655 . ?
C1 C2 Si1 108.86(13) 2_655 . ?
C1 C2 Si2 111.44(14) 2_655 . ?
Si1 C2 Si2 119.15(11) . . ?
C1 Si1 C2 110.84(9) . . ?
C1 Si1 Cl1 108.80(7) . . ?
C2 Si1 Cl1 111.40(7) . . ?
C1 Si1 Cl2 107.32(8) . . ?
C2 Si1 Cl2 109.83(7) . . ?
Cl1 Si1 Cl2 108.54(4) . . ?
C3 Si2 C2 115.97(11) . . ?
C3 Si2 Cl4 111.15(11) . . ?
C2 Si2 Cl4 108.79(7) . . ?
C3 Si2 Cl3 108.12(9) . . ?
C2 Si2 Cl3 106.66(7) . . ?
Cl4 Si2 Cl3 105.54(4) . . ?
 
_diffrn_measured_fraction_theta_max    0.980
_diffrn_reflns_theta_full              27.48
_diffrn_measured_fraction_theta_full   0.980
_refine_diff_density_max    0.502
_refine_diff_density_min   -0.498
_refine_diff_density_rms    0.071

#===END
